# Supplementary material for: Voltage sweep modulated conductance quantization in oxide nanocomposites
Source: Royal Society of Chemistry journal article supplement (doi:10.1039/c4tc01984a), 2014-10-10
Supplement: c4tc01984a1.pdf [file c4tc01984a1.pdf]

# Voltage Sweep Modulated Conductance Quantization in Oxide Nanocomposite

Adnan Younis, Sean Li and Dewei Chu\*

*School of Materials Science and Engineering, University of New South Wales, Sydney, 2052,  
NSW, Australia*

## Supporting information

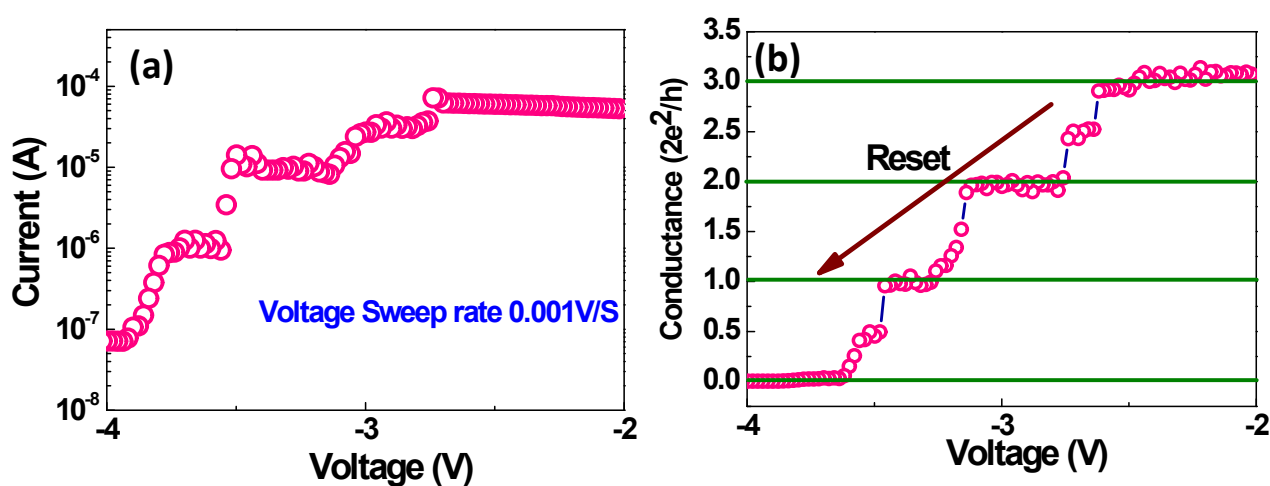

**Figure S1:** (a) I–V curve with voltage sweep of 0.001V/s from -2 to -4V shows multistep reset process (b) quantized conductance plateaus during reset process.

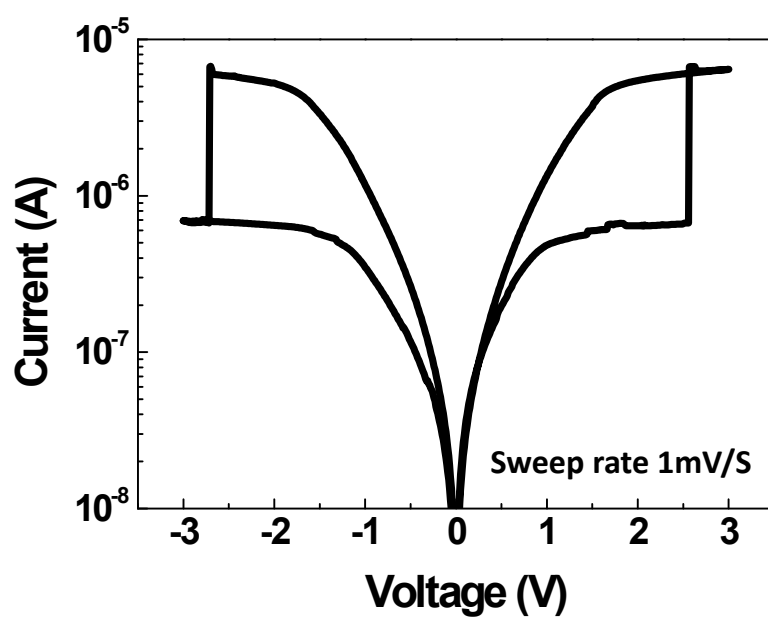

**Figure S2:** Typical one step set process with voltage sweep of 0.001V/s for  $\text{CeO}_2$  nanorods based device.

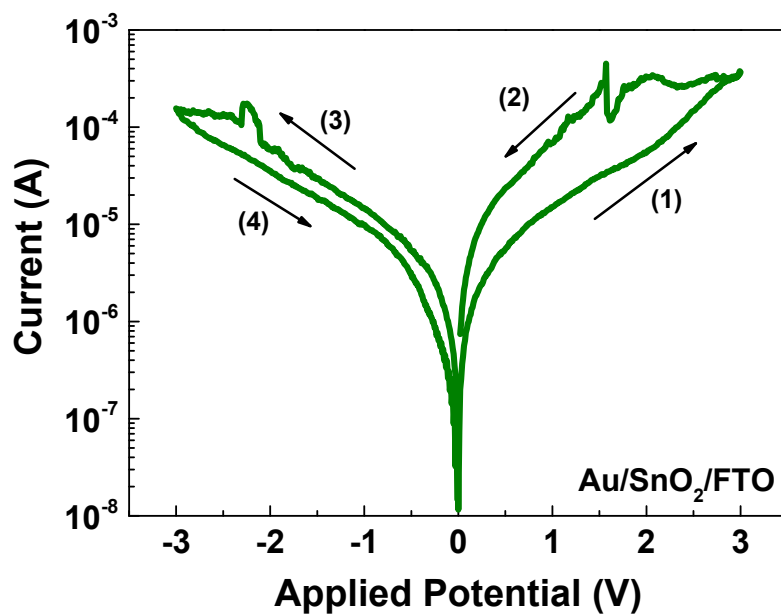

**Figure S3:** IV curves with voltage sweep of 0.001V/s for  $\text{Au/SnO}_2/\text{FTO}$  device.

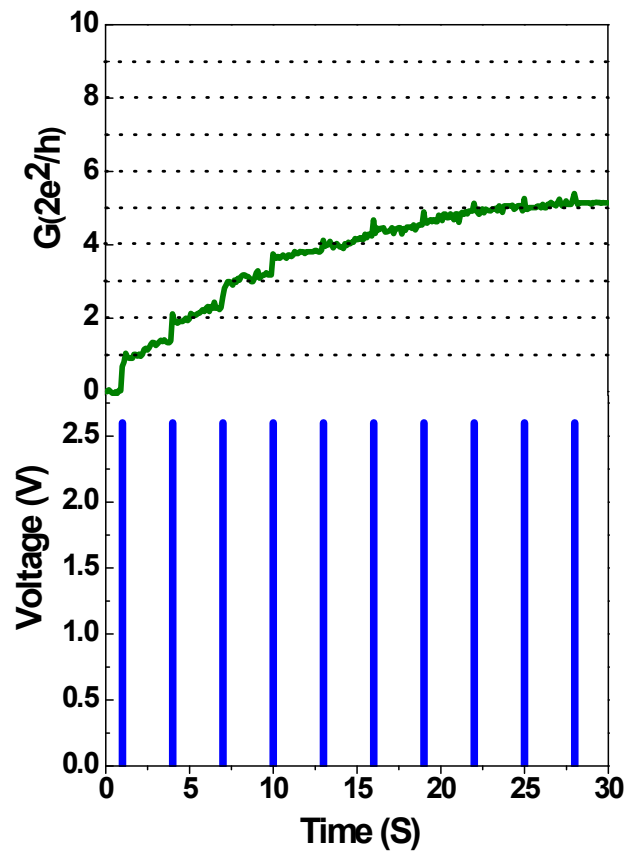

**Figure S4:** Conductance quantization behaviour under 3V fixed voltage pulse (interval between pulses is 3 S) with varying pulse widths (from 50  $\mu$ S to 100  $\mu$ S, in increments of 5  $\mu$ S).

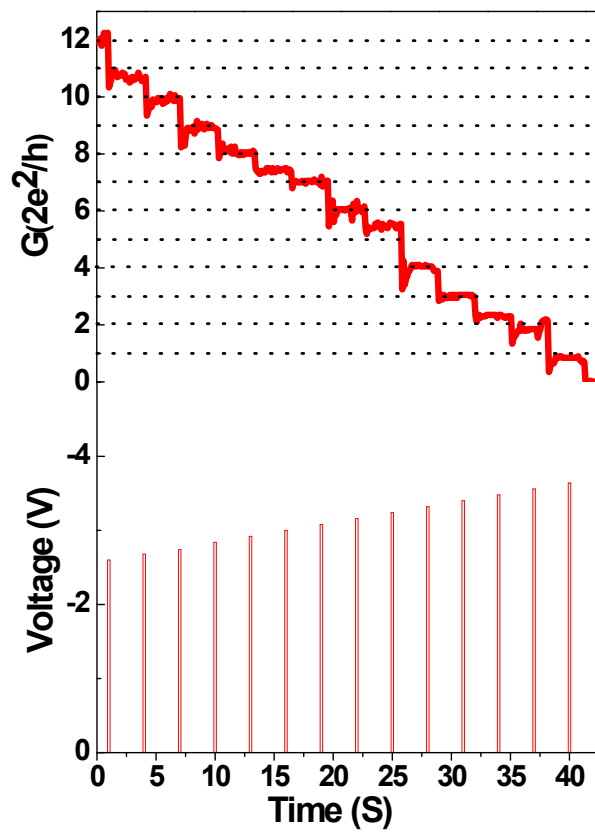

**Figure S5:** Quantized conductance characteristics in the SnO<sub>2</sub>-CeO<sub>2</sub> nanocomposite memory cell by applying negative voltages pulses with a width of 10 ns at intervals of 3 S. The pulse amplitude was varied from -2.6 V to -3.7 V in increments of -0.08 V. Quantized conductance step can be observed with slight fluctuations.

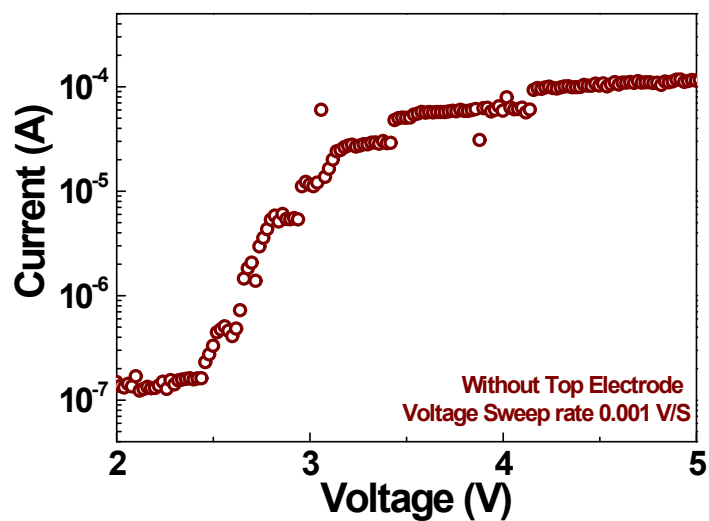

**Figure S6:** I-V measurements of SnO<sub>2</sub>-CeO<sub>2</sub>/FTO device without gold top-electrode at voltage sweep rate of 0.001V/s.
